# Supplementary material for: Interfacial self-assembly of nanoporous C60 thin films
Source: Royal Society of Chemistry journal article supplement (doi:10.1039/c6ra02720b), 2016-01-01
Supplement: c6ra02720b1.pdf [file c6ra02720b1.pdf]

## Supplementary Information

### Interfacial self-assembly of nanoporous $C_{60}$ thin films

*Jean-Nicolas Tisserant,\* Patrick A. Reissner, Sandra Jenatsch, Hannes Beyer,  
Roland Hany, Andreas Stemmer\**

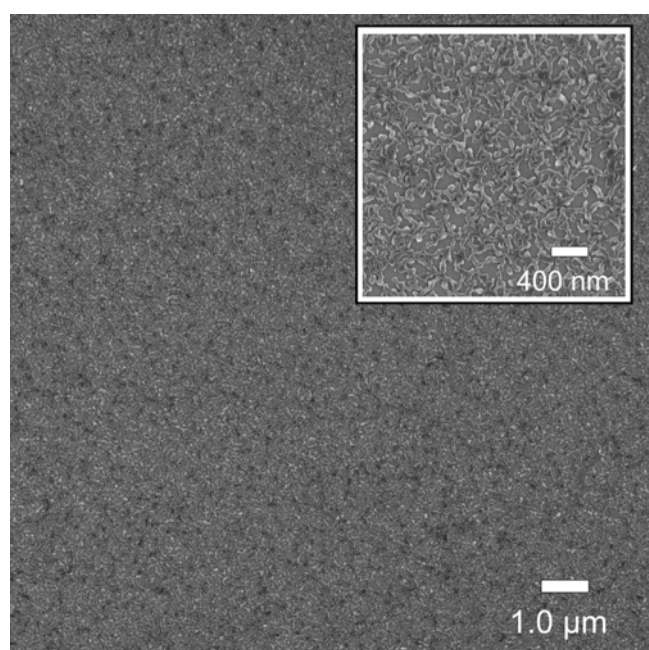

**Figure S1.** Large scale SEM image of a nanostructured  $C_{60}$  film and magnification (inset).

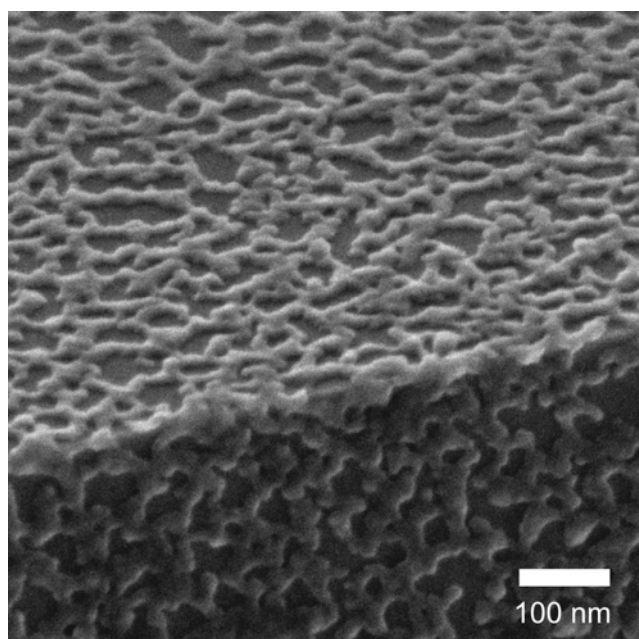

**Figure S2.** Flexibility of a C<sub>60</sub> nanostructured thin film demonstrated by imaging over perpendicular surfaces of a silicon substrate.

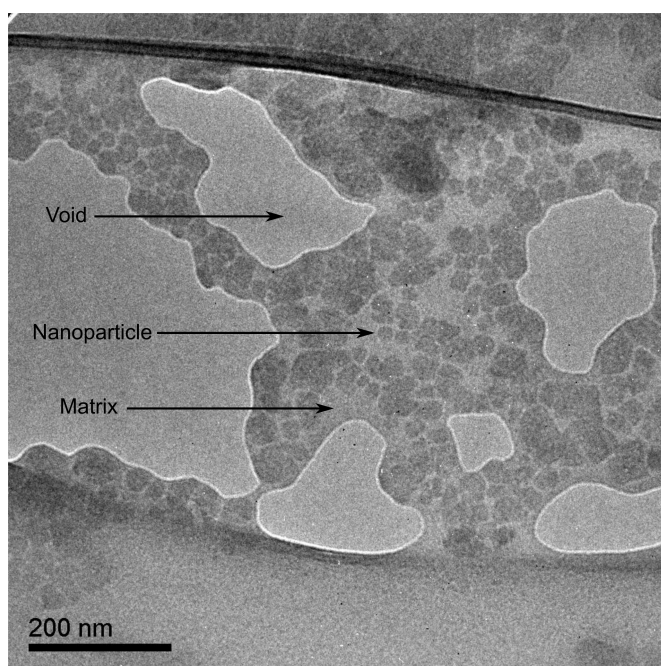

**Figure S3.** TEM image of a nanostructured C<sub>60</sub> film. The image shows 10-50 nm large C<sub>60</sub> particles embedded in a C<sub>60</sub> matrix.

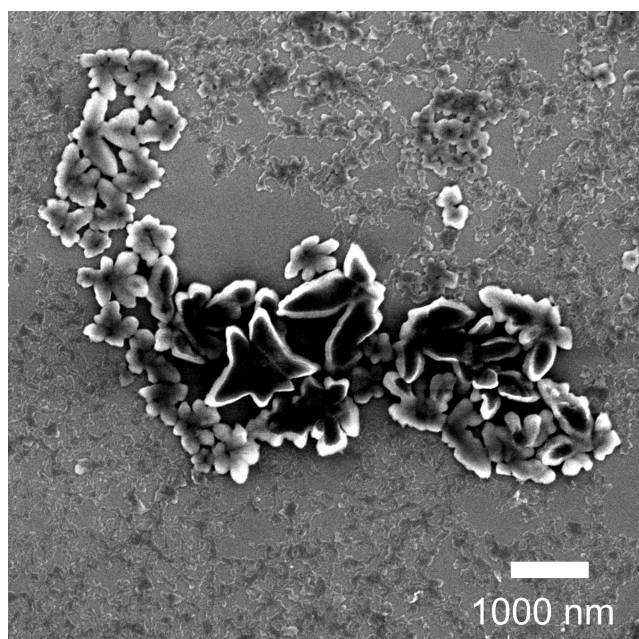

**Figure S4.** SEM image of a  $C_{60}$  film when depositing 250  $\mu\text{L}$   $\text{CHCl}_3 / C_{60}$  solution at  $P=500$  mbar on an area of  $3.5\text{ cm}^2$ . For volumes over  $\sim 200\text{ }\mu\text{L}$ , overgrowth of large  $C_{60}$  crystals occurs.

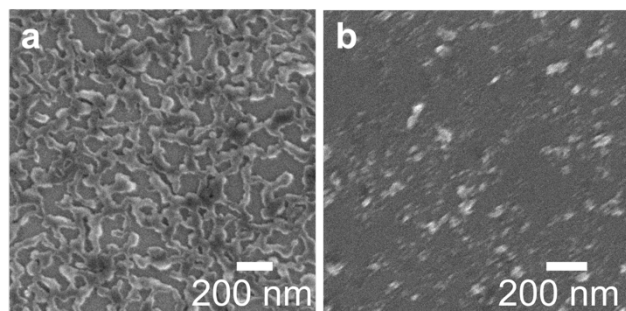

**Figure S5.** Solubility of  $C_{60}$  films deposited on Si without light-induced polymerization. SEM images (a) Pristine  $C_{60}$  film; (b) film residues after chloroform rinsing without prior light exposure.

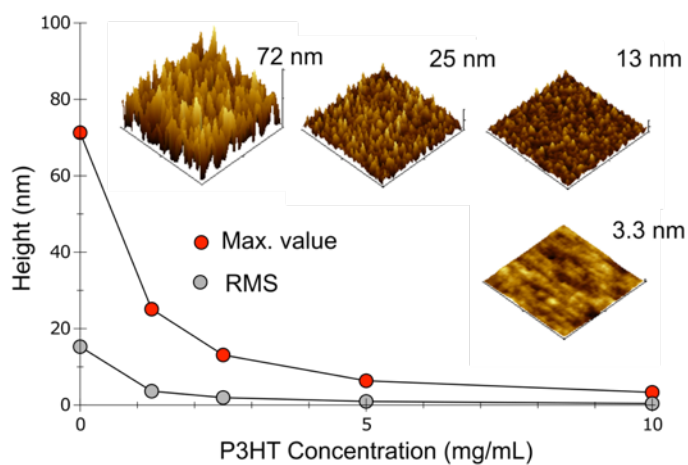

**Figure S6.** Infiltration of stabilized  $C_{60}$  nanostructures with P3HT. P3HT films were coated at 1000 rpm for 30 s from chloroform solutions. Red: maximum peak-to-valley

distance, grey: RMS roughness. Insets show SFM images of films obtained at 0, 1.25, 2.5 and 10 mg P3HT/mL.

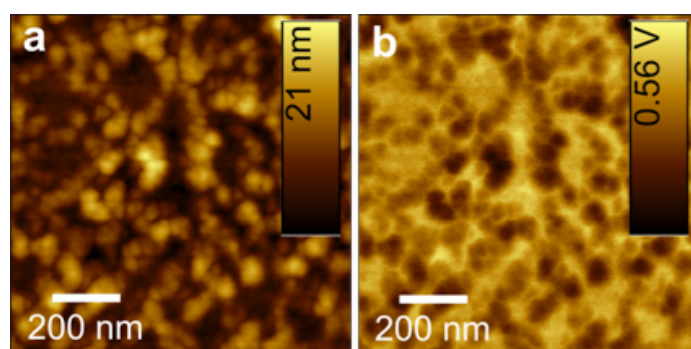

**Figure S7.** Scanning force microscopy images of nanostructured  $C_{60}$ , after light exposure and partial P3HT coating (2.5 mg/mL, 1000 rpm). (a) SFM topography showing reduced height difference and filling of the voids in the  $C_{60}$  layers, as well as the stability of the  $C_{60}$  domains; (b) Electrostatic force microscopy phase showing  $C_{60}$  domains (dark) and P3HT filling (bright).

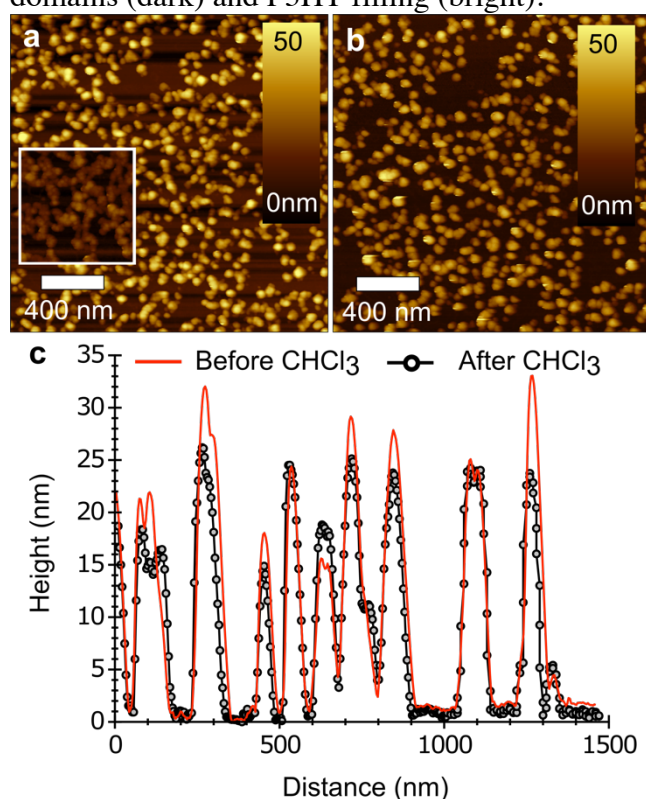

**Figure S8.** Evolution of the morphology upon film drying and consecutive film stabilization. (a) SFM image of a nano-structured  $C_{60}$  film after drying for 6 h at 80°C under nitrogen atmosphere and photo-polymerization, the inset shows the pristine film; (b) SFM image of the same area as (a) after solvent rinsing; (c) representative profiles extracted from (a) and (b).

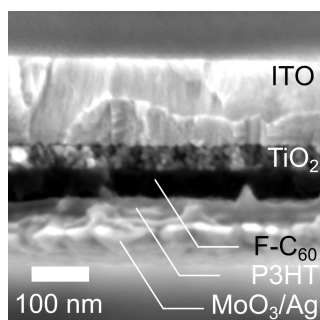

**Figure S9.** SEM cross-section image of a light-stabilized planar bilayer  $C_{60}$ /P3HT solar cell.

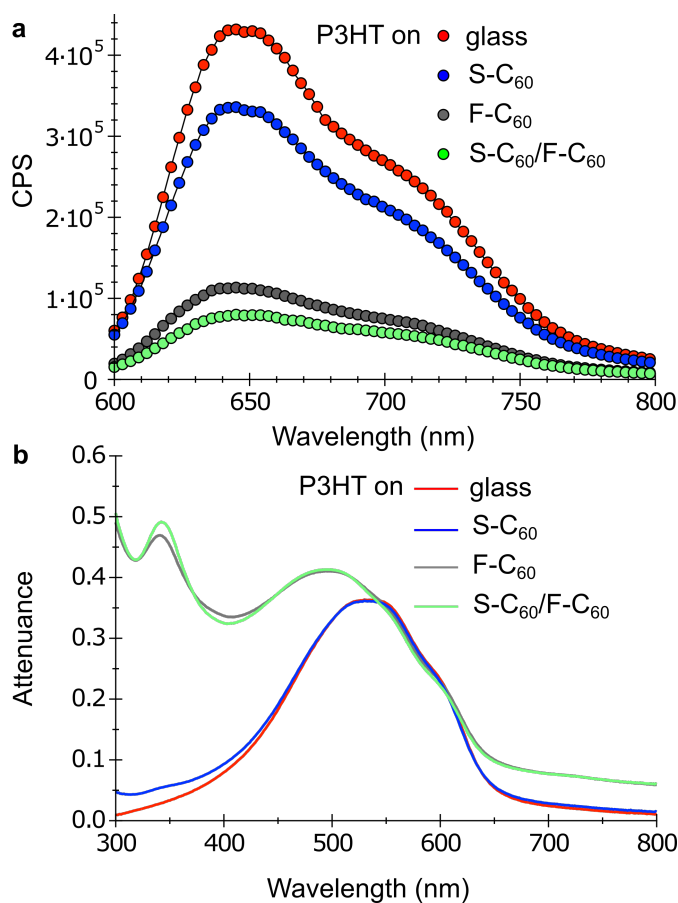

**Figure S10.** Photoluminescence of P3HT films, the excitation wavelength was at 550 nm, all  $C_{60}$  films were light-stabilized. (a) quenching of photoluminescence in architectures comparable to the ones used in solar cells, red: pristine P3HT, blue: on S- $C_{60}$ , grey: on F- $C_{60}$ , green; on F- $C_{60}$  + S- $C_{60}$ . The photoluminescence intensity drops by 30% at 643 nm between F- $C_{60}$  and S- $C_{60}$ /F- $C_{60}$ . (b) UV-Vis of corresponding films showing a constant P3HT absorption.

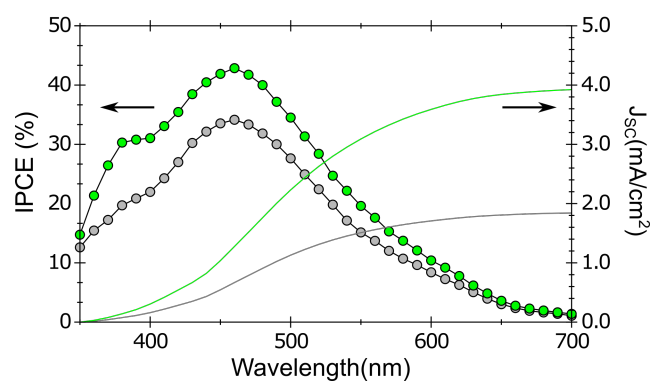

**Figure S11.** Internal photon-to-current conversion efficiency (IPCE) measurements and corresponding  $J_{sc}$ . grey: F-C<sub>60</sub>, green: 2 layers S-C<sub>60</sub> on F-C<sub>60</sub>.
